# Supplementary material for: Nanostructured Fe2TiO5 photoanode with enhanced photoelectrochemical water splitting performance by Zn2+ doping and FeNi(OH)x cocatalyst deposition
Source: Royal Society of Chemistry journal article supplement (doi:10.1039/d4ce00681j), 2024-01-01
Supplement: d4ce00681j1.pdf [file d4ce00681j1.pdf]

## Supporting Information

### **Nanostructured Fe<sub>2</sub>TiO<sub>5</sub> photoanode with enhanced photoelectrochemical water splitting performance by Zn<sup>2+</sup> doping and FeNi(OH)<sub>x</sub> cocatalyst deposition**

Deshun Chen,<sup>†a</sup> Mengna Duan,<sup>†a,c</sup> Meng Wang,<sup>\*b</sup> Wei Ma,<sup>a</sup> Xinglei Zhang<sup>d</sup> and Xiaofeng Wu<sup>\*a</sup>

<sup>a</sup> State Key Laboratory of Inorganic Synthesis and Preparative Chemistry, Jilin Provincial International Cooperation Key Laboratory of Advanced Inorganic Solid Functional Materials, College of Chemistry, Jilin University, No. 2699, Qianjin Street, Changchun 130012, People's Republic of China

<sup>b</sup> Jiangxi Key Laboratory for Mass Spectrometry and Instrumentation, East China University of Technology, Nanchang, 330013, People's Republic of China

<sup>c</sup> Department of Pediatrics, The First Hospital of Jilin University, Jilin University, No. 71, Xinmin Street, Changchun, 130012, People's Republic of China

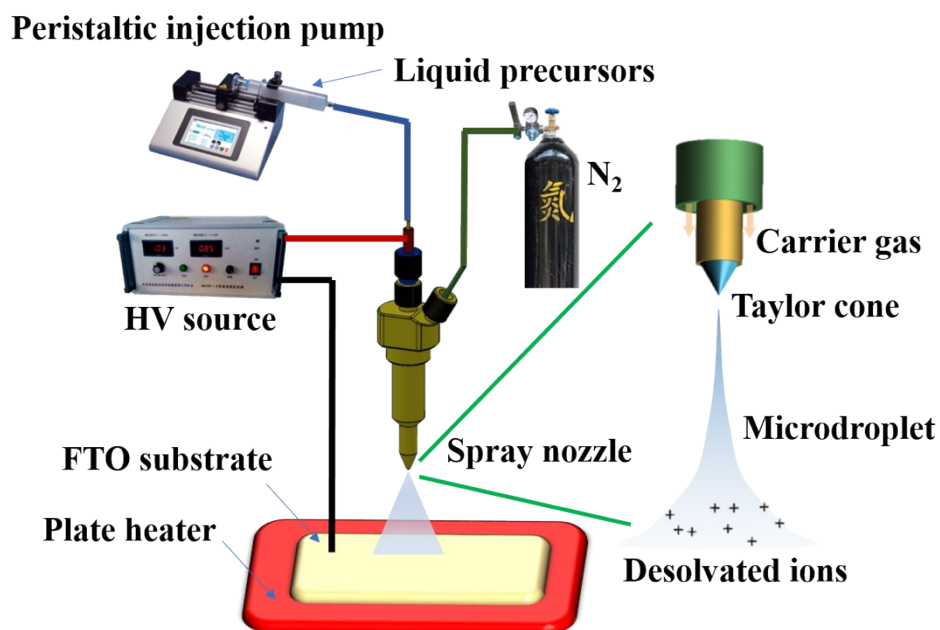

Figure S1 Schematic diagram of homemade electro spray equipment.

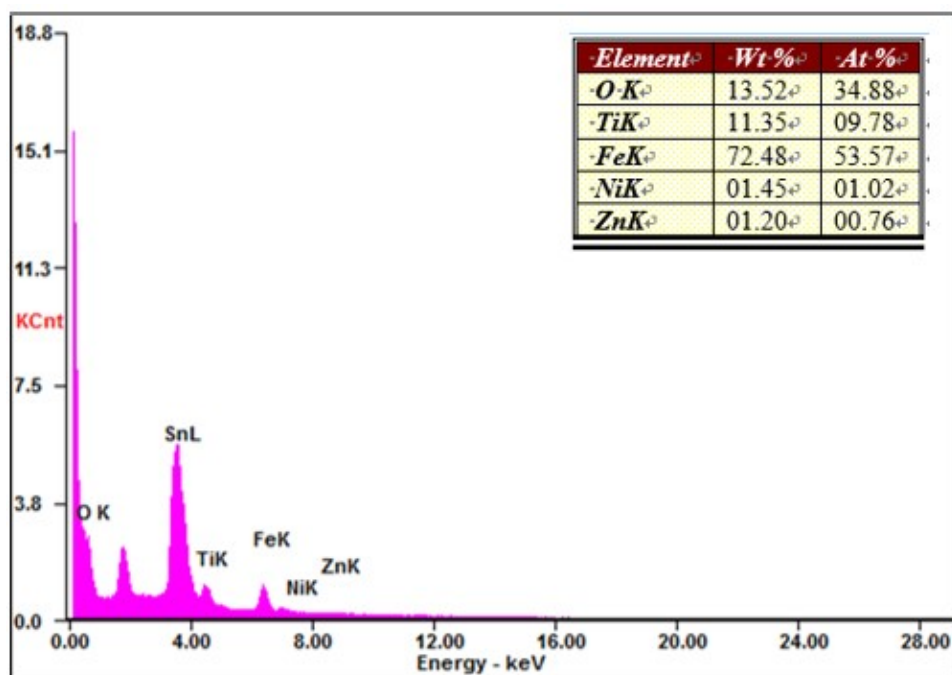

Figure S2 EDS spectra of FeNi(OH)<sub>x</sub>/Zn@ Fe<sub>2</sub>TiO<sub>5</sub> photoanode.

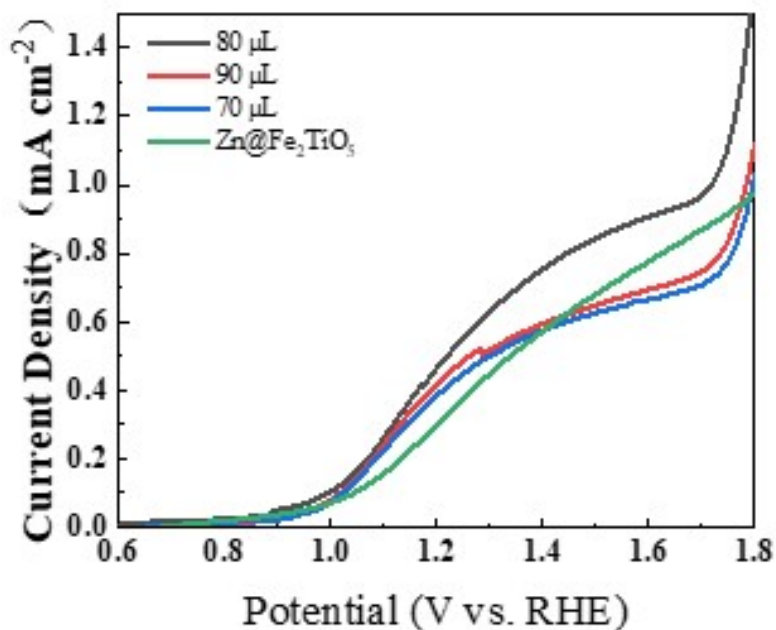

**Figure S3** LSV curves of  $\text{FeNi(OH)}_x/\text{Zn@Fe}_2\text{TiO}_5$  with different volume of Fe-Ni precursor deposition.

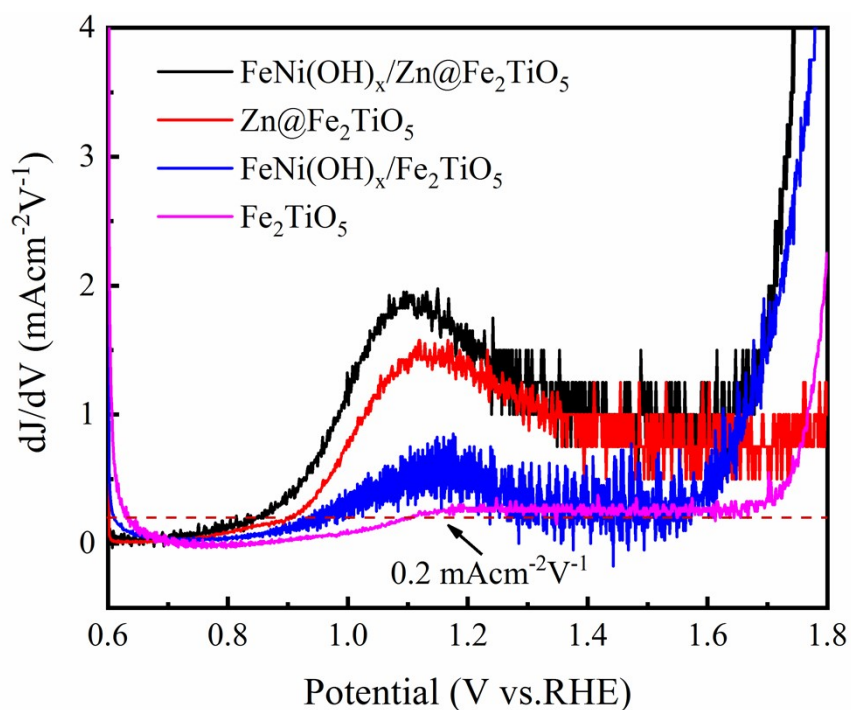

**Figure S4** First-order derivative of the photocurrent densities based on the J-V curves of Figure 4b.

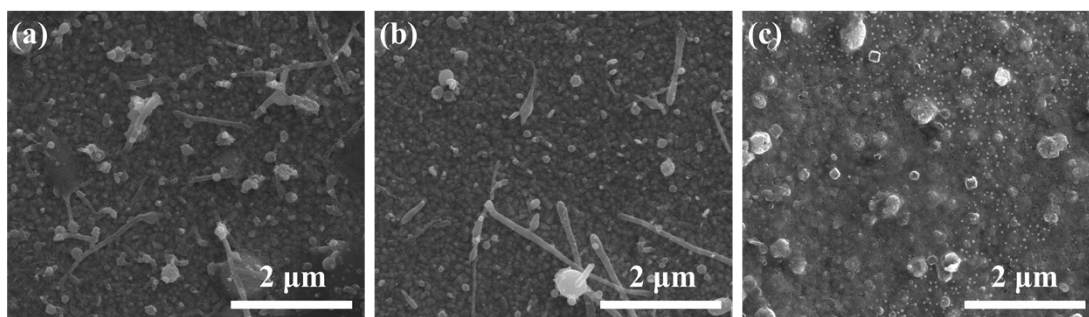

**Figure S5 SEM of the samples after LSV measurement. (a) Fe<sub>2</sub>TiO<sub>5</sub>; (b) Zn@ Fe<sub>2</sub>TiO<sub>5</sub>; (c) FeNi(OH)<sub>x</sub>/Zn@ Fe<sub>2</sub>TiO<sub>5</sub>.**

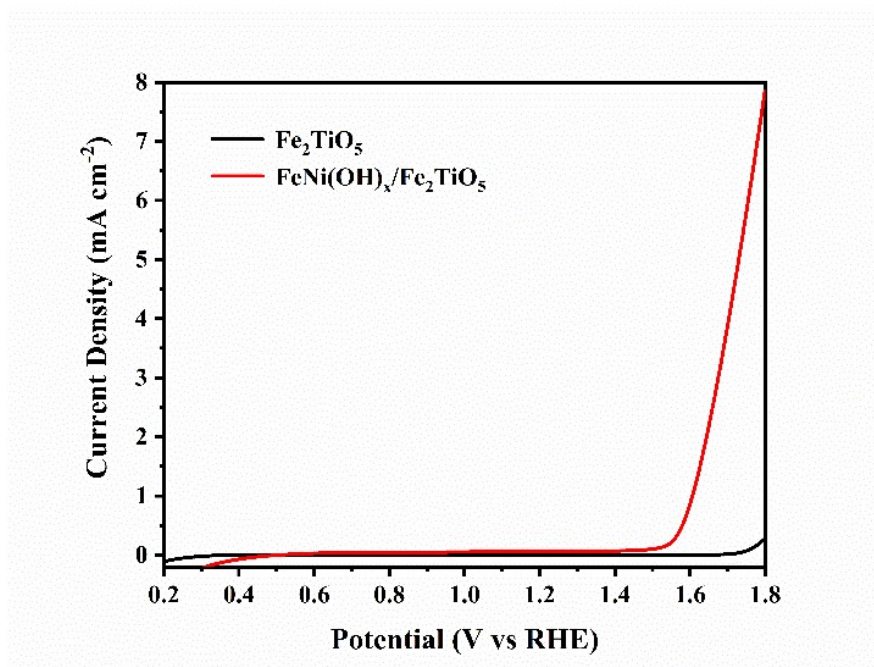

**Figure S6 Current density of Fe<sub>2</sub>TiO<sub>5</sub> and FeNi(OH)<sub>x</sub>/Zn@Fe<sub>2</sub>TiO<sub>5</sub> under dark condition.**

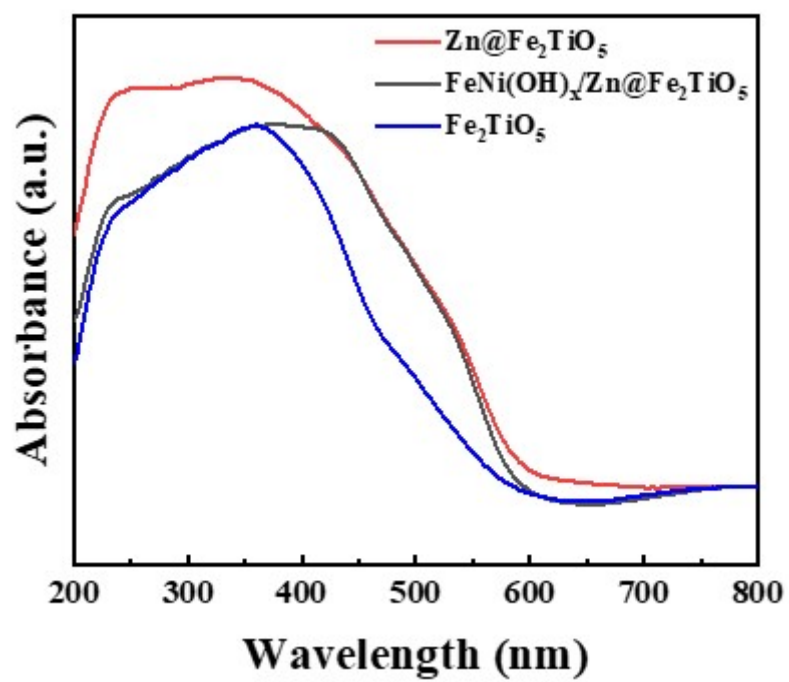

Figure S7 UV-vis spectra of the three samples.
